# Supplementary material for: Genome-Wide Association Study (GWAS) Identifies Key Candidate Genes Associated with Leaf Size in Alfalfa (Medicago sativa L.)
Source: MDPI journal article supplement (doi:10.3390/agriculture13122237), 2023-12-04
Supplement: s1 [file s1]

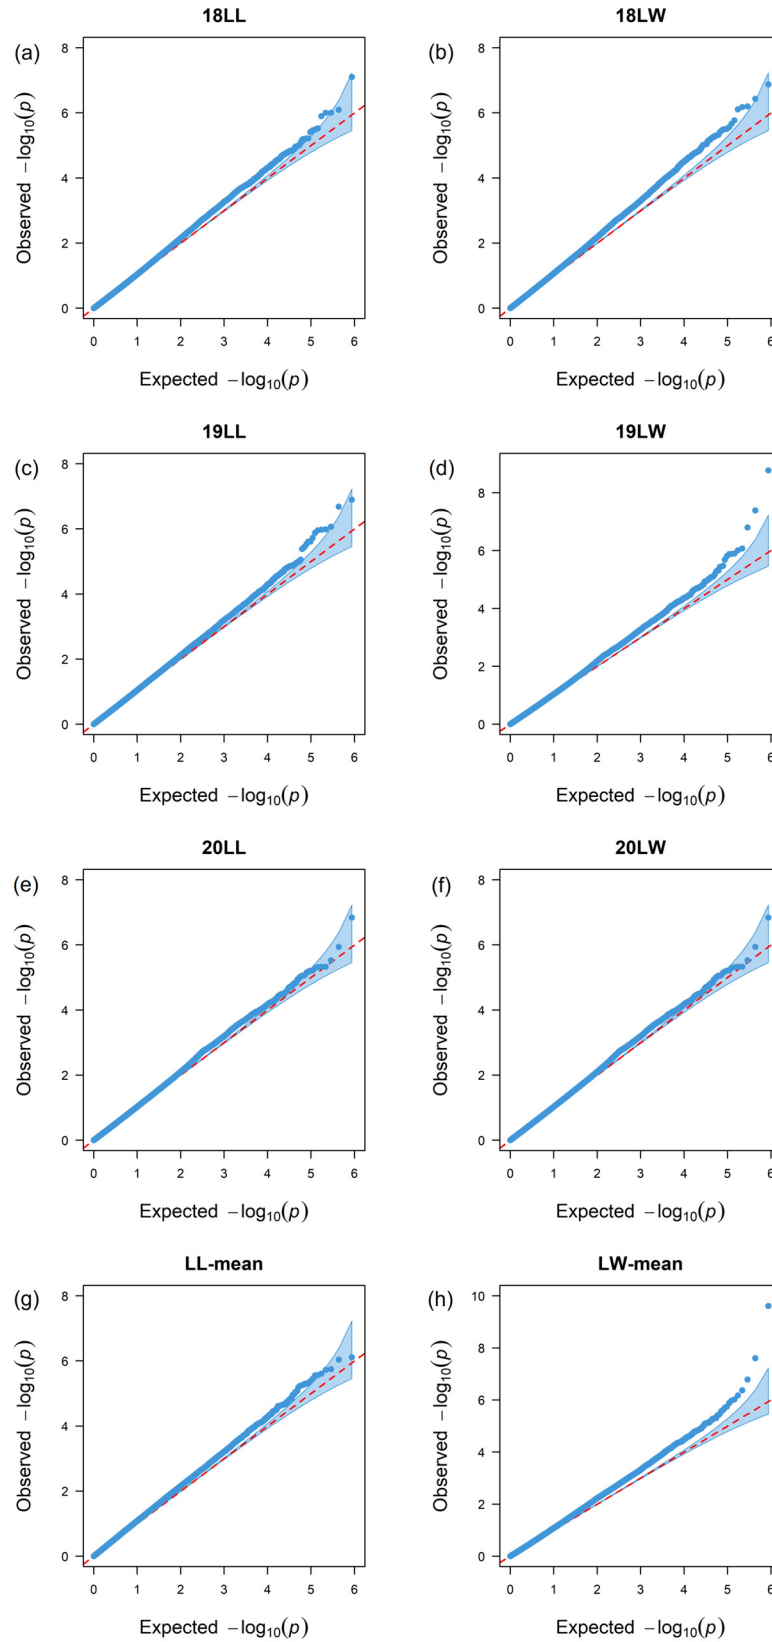

**Figure S1.** Quantile–quantile (QQ) plots from GWAS for leaf types for each year. The blue line represents the expected distribution of  $p$ -values, and the red dotted line indicates a reference or threshold. The observed  $p$ -values are shown as blue dots.



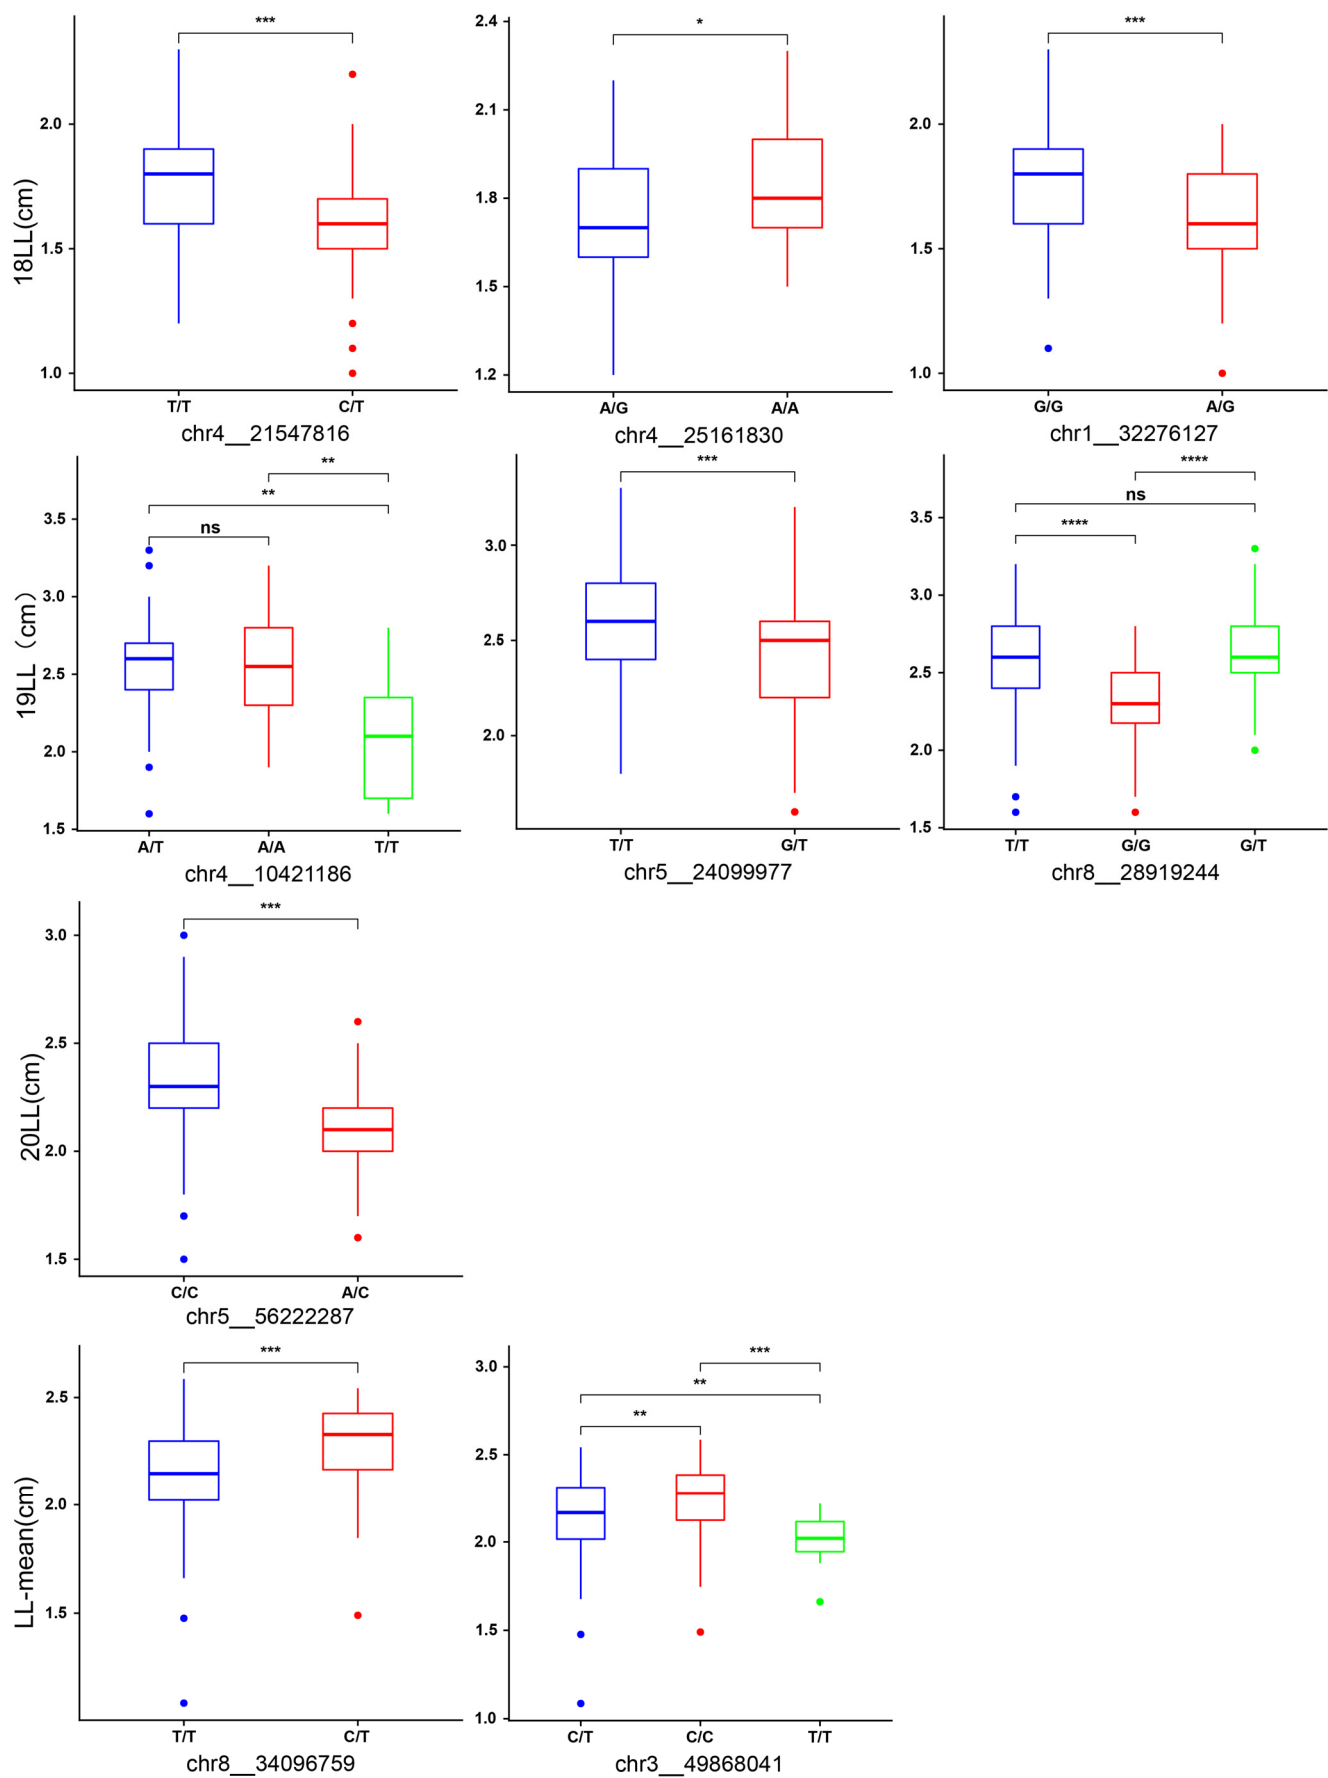

**Figure S3.** Haplotype analysis of SNP related to leaf length (LL).

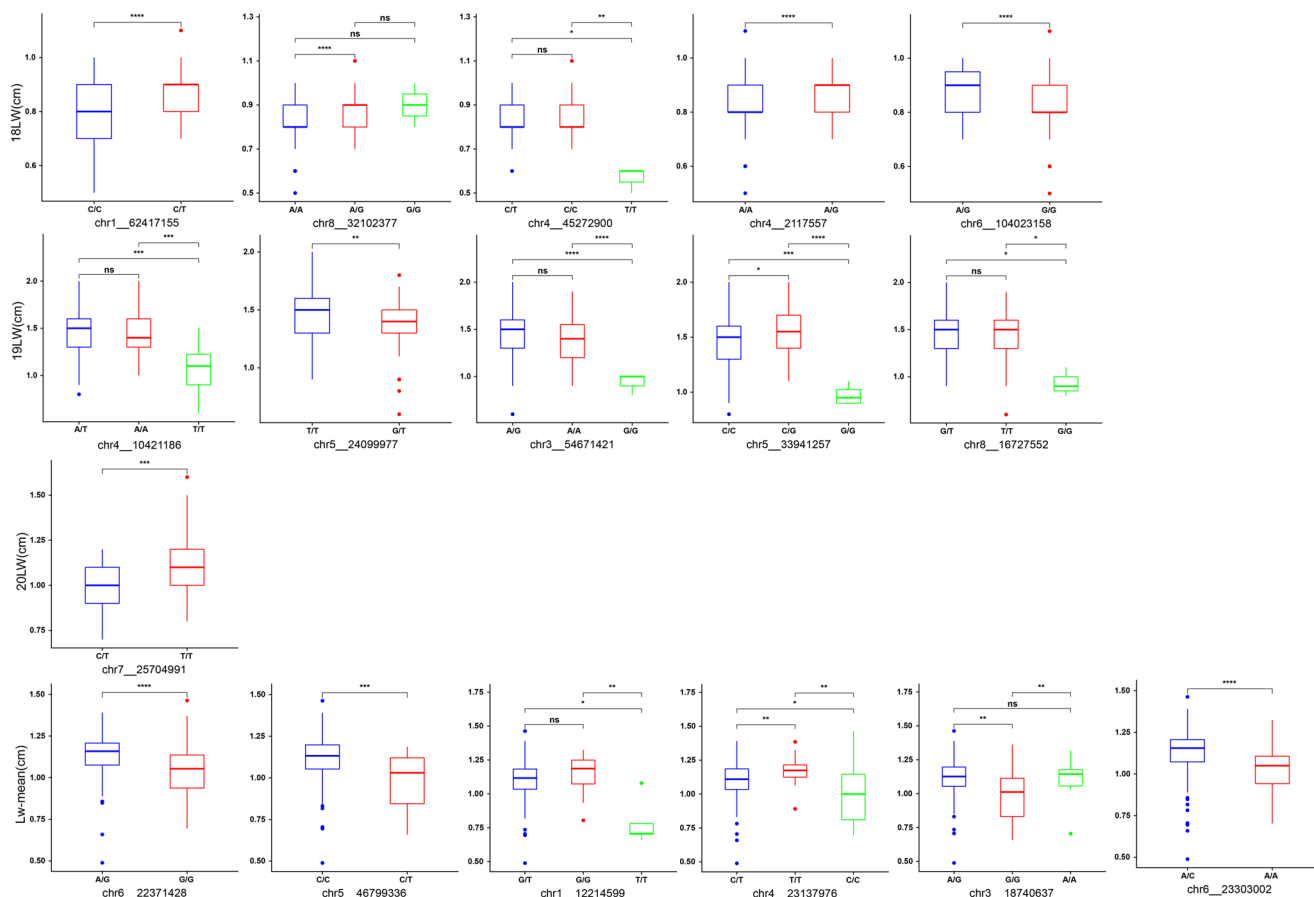

**Figure S4.** Haplotype analysis of SNP related to leaf width (LW).

**Table S1.** Details of the 13 Chinese cultivars.

| Taxa | Accession | Name          | Improvement of Breeding status | Region |
|------|-----------|---------------|--------------------------------|--------|
| B10  | CF032020  | Zhongmu No.1  | Cultivar                       | China  |
| B140 | CF002722  | Xinmu         | Cultivar                       | China  |
| B141 | CF020901  | Gannong No.3  | Cultivar                       | China  |
| B145 | CF000715  | Gongnong No.1 | Cultivar                       | China  |
| B148 | CF020976  | Guyuan        | Cultivar                       | China  |
| B152 | CF030056  | Xinjiangdaye  | Cultivar                       | China  |
| B159 | PI502646  | Gongnong      | Cultivar                       | China  |
| B160 | PI499544  | D2675         | Cultivar                       | China  |
| B161 | PI502647  | Humeng        | Cultivar                       | China  |
| B172 | PI491400  | Wuming        | Cultivar                       | China  |
| B173 | PI491401  | Wulumuqi      | Cultivar                       | China  |
| B9   | PI430638  | Yuhisian      | Cultivar                       | China  |
| B93  | PI430636  | Tingsi        | Cultivar                       | China  |

**Table S2.** Candidate gene prediction and functional annotation.

| Trait   | Marker         | Gene Model | Chromosome | Position  |          |        | BLAST-P                                                              |                         |        |
|---------|----------------|------------|------------|-----------|----------|--------|----------------------------------------------------------------------|-------------------------|--------|
|         |                |            |            | Start-Pos | End-Pos  | Strand | Annotation                                                           | E-Value                 | %ID    |
| 18LL    | chr4__21547816 | Msa0540020 | 4          | 21527816  | 21567816 | -      | TATA-binding protein-associated factor BTAF1 isoform X1              | 0                       | 95.68% |
|         | chr4__25161830 | Msa0541350 | 4          | 25141830  | 25181830 | +      | CAX-interacting protein 4                                            | $4.00 \times 10^{-78}$  | 89.15% |
|         | chr1__32276127 | Msa0018930 | 1          | 32256127  | 32296127 | +      | transmembrane protein, putative                                      | $3.00 \times 10^{-25}$  | 49.38% |
| 18LW    | chr1__62417155 | Msa0034420 | 1          | 62397155  | 62437155 | +      | putative E3 ubiquitin-protein ligase RF4 isoform X2                  | 0                       | 97.17% |
|         |                | Msa0034430 | 1          | 62397155  | 62437155 | +      | endonuclease/exonuclease/phosphatase family protein                  | 0                       | 95.44% |
|         |                | Msa0034440 | 1          | 62397155  | 62437155 | -      | putative histone acetyltransferase                                   | $4.00 \times 10^{-76}$  | 78.53% |
|         | chr8__32102377 | Msa1189740 | 8          | 32082377  | 32122377 | -      | GDSL esterase/lipase At5g22810                                       | $3.00 \times 10^{-87}$  | 70.44% |
|         | chr4__45272900 | Msa0549940 | 4          | 45252900  | 45292900 | -      | ATP-dependent Clp protease proteolytic subunit 6, chloroplastic      | 0                       | 95.99% |
|         |                | Msa0549950 | 4          | 45252900  | 45292900 | +      | organ-specific protein P4                                            | $3.00 \times 10^{-57}$  | 92.71% |
|         |                | Msa0549960 | 4          | 45252900  | 45292900 | -      | BURP domain protein USPL1                                            | 0                       | 96.01% |
| 19LL    | chr4__10421186 | Msa0534800 | 4          | 10401186  | 10441186 | +      | protein FAR1-RELATED SEQUENCE 5-like                                 | 0                       | 86.65% |
|         |                | Msa0534810 | 4          | 10401186  | 10441186 | +      | Ulp1 protease family, carboxy-terminal domain protein                | 0                       | 80.25% |
|         | chr8__28919244 | Msa1188590 | 8          | 28899244  | 28939244 | +      | CTP synthase                                                         | 0                       | 96.52% |
|         |                | Msa1188600 | 8          | 28899244  | 28939244 | -      | zinc finger CCCH domain-containing protein 37                        | 0                       | 97.48% |
|         | chr4__10421186 | Msa0534800 | 4          | 10401186  | 10441186 | +      | protein FAR1-RELATED SEQUENCE 5-like                                 | 0                       | 86.65% |
| 19LW    |                | Msa0534810 | 4          | 10401186  | 10441186 | +      | Ulp1 protease family, carboxy-terminal domain protein                | 0                       | 80.25% |
|         | chr3__54671421 | Msa0362890 | 3          | 54651421  | 54691421 | -      | E3 ubiquitin-protein ligase KEG                                      | 0                       | 96.87% |
|         | chr8__16727552 | Msa1181920 | 8          | 16707552  | 16747552 | -      | probable polygalacturonase At3g15720                                 | $6.00 \times 10^{-156}$ | 69.19% |
|         |                | Msa1181930 | 8          | 16707552  | 16747552 | -      | Ulp1 protease family, carboxy-terminal domain protein                | $5.00 \times 10^{-121}$ | 50.12% |
|         |                | Msa1181970 | 8          | 16707552  | 16747552 | -      | polygalacturonase                                                    | 0                       | 77.12% |
| 20LL    | chr5__56222287 | Msa0738440 | 5          | 56202287  | 56242287 | +      | 26S proteasome non-ATPase regulatory subunit 7 homolog A             | 0                       | 95.09% |
|         |                | Msa0738450 | 5          | 56202287  | 56242287 | +      | probable LRR receptor-like serine/threonine-protein kinase At3g47570 | 0                       | 77.90% |
|         |                | Msa0738480 | 5          | 56202287  | 56242287 | +      | probable LRR receptor-like serine/threonine-protein kinase At3g47570 | 0                       | 87.06% |
| LL-mean | chr8__34096759 | Msa1190810 | 8          | 34076759  | 34116759 | +      | ribonuclease 3-like protein 2                                        | 0                       | 92.69% |
|         |                | Msa1190820 | 8          | 34076759  | 34116759 | -      | metallothionein-like protein type 3                                  | $1.00 \times 10^{-36}$  | 100%   |
|         | chr3__49868041 | Msa0360500 | 3          | 49848041  | 49888041 | -      | DEAD-box ATP-dependent RNA helicase 38                               | 0                       | 71.73% |
|         |                | Msa0360510 | 3          | 49848041  | 49888041 | -      | acetyltransferase (GNAT) domain protein                              | $4.00 \times 10^{-147}$ | 67.85% |
| LW-mean | chr6__22371428 | Msa0879720 | 6          | 22351428  | 22391428 | +      | F-box/FBD/LRR-repeat protein At4g26340                               | $2.00 \times 10^{-163}$ | 65.74% |
|         | chr5__46799336 | Msa0733480 | 5          | 46779336  | 46819336 | -      | probable ribonuclease P/MRP protein subunit POP5                     | $1.00 \times 10^{-109}$ | 100%   |

---

|                |            |   |          |          |   |                                  |                        |        |
|----------------|------------|---|----------|----------|---|----------------------------------|------------------------|--------|
|                | Msa0733510 | 5 | 46779336 | 46819336 | + | sm-like protein LSM3A            | $4.00 \times 10^{-62}$ | 100%   |
| chr1__12214599 | Msa0008500 | 1 | 12194599 | 12234599 | - | hydroquinone glucosyltransferase | $1.00 \times 10^{-67}$ | 86.05% |
|                | Msa0008520 | 1 | 12194599 | 12234599 | + | protein ATAF2 isoform X1         | 0                      | 95.58% |

---
